# Supplementary material for: Individual-Based Model of Microbial Life on Hydrated Rough Soil Surfaces
Source: PubMed Central journal article supplement (PMC4726620; doi:10.1371/journal.pone.0147394), 2016-01-25
Supplement: pone.0147394.s002.pdf [file pone.0147394.s002.pdf]

## S2 Table

**Table 2. Parameters for Individual Based Modelling (IBM)**

| Notation       | Parameter                      | unit                              | value              |
|----------------|--------------------------------|-----------------------------------|--------------------|
| $\mu_{\max}^i$ | specific growth rate           | hr <sup>-1</sup>                  | Vary <sup>a</sup>  |
| $K_s^i$        | half-saturation constant       | mg.L <sup>-1</sup>                | Vary <sup>b</sup>  |
| $Y_{\max}$     | apparent yield                 | g.g <sup>-1</sup>                 | 0.44 <sup>c</sup>  |
| $\alpha_m$     | ratio for maintenance rate     | -                                 | 0.0129             |
| $\bar{V}_B$    | median cell volume             | fl                                | 0.4                |
| $V_{B,d}$      | cell volume at division        | fl                                | $2\bar{V}_B/1.433$ |
| $V_{\min,d}$   | minimal active cell volume     | fl                                | $\bar{V}_B/5$      |
| $\rho$         | cell density (dry mass)        | fg.fl <sup>-1</sup>               | 290                |
| $R$            | size of microbial cells        | $\mu\text{m}$                     | 1                  |
| $D_0$          | nutrient diffusion coefficient | mm <sup>2</sup> .hr <sup>-1</sup> | 2.4                |
| $v_0$          | cell velocity at bulk water    | mm.hr <sup>-1</sup>               | 50.4               |
| $\chi_0$       | chemotactic sensitivity        | mm <sup>2</sup> .hr <sup>-1</sup> | 180                |
| $\beta$        | by-product yield               | g.g <sup>-1</sup>                 | 0.8                |

Parameters used to simulate microorganisms. Most of parameters for individual cells are chosen from [1].

<sup>a</sup>  $\mu_{\max} = 1.23\text{hr}^{-1}$  is used for a single species and mutualistic trophic interaction. For the evaluation of microbial diversity, values are chosen uniformly spaced values in  $\mathcal{U}[0.5\mu_{\max}, 1.5\mu_{\max}]$ .

<sup>b</sup>  $K_s = 1.17\text{mg.L}^{-1}$  is used for a single species. For the mutualistic trophic interaction,  $K_{s,1} = K_{s,2} = K_{I,1} = 10^{-3}\text{mg.L}^{-1}$  are used. For the evaluation of microbial diversity, values are logarithmically spaced values in  $\mathcal{U}[10^{-2}K_s, K_s]$ .

<sup>c</sup>  $\mu_{\max}$ ,  $K_s$  and  $Y_{\max}$  for the Fig. 7A and Fig. 7C in the main text (Competitive trophic interaction) were used differently following the work of [2].

## References

- [1] Kreft JU, Booth G, Wimpenny JWT. BacSim, a simulator for individual-based modelling of bacterial colony growth. *Microbiology*. 1998;144(12):3275–3287.

- [2] Wang G, Or D. Trophic interactions induce spatial self-organization of microbial consortia on rough surfaces. *Scientific Reports*. 2014;4.
